1 **Transactional sex and age-disparate sexual partnerships among adolescent girls and young**  
2 **women in Tanzania**

3 Katherine B. Rucinski<sup>1\*</sup>, Gaspar Mbita<sup>2,3</sup>, Kaitlyn Atkins<sup>4</sup>, Esther Majani<sup>5</sup>, Albert Komba<sup>6</sup>,  
4 Caterina Casalini<sup>6</sup>, Mary Drake<sup>6</sup>, Neema Makyo<sup>7</sup>, Anthony Galishi<sup>8</sup>, Yeronimo Mlaw<sup>9</sup>, Joyce  
5 Wamoyi<sup>10</sup>, Sheree Schwartz<sup>4</sup>, Stefan Baral<sup>4</sup>, Kelly Curran<sup>11</sup>

6  
7 1 Department of International Health, Johns Hopkins School of Public Health, Baltimore, MD,  
8 USA

9 2 Jhpiego, Monrovia, Liberia

10 3 Athena Institute, Vrije Universiteit, Amsterdam, The Netherlands

11 4 Department of Epidemiology, Johns Hopkins School of Public Health, Baltimore, MD, USA

12 5 Embassy of Switzerland in Tanzania, Dar es Salaam, Tanzania

13 6 Jhpiego, Dar es Salaam, Tanzania

14 7 Amref Health Africa, Dar es Salaam, Tanzania

15 8 National Malaria Control Program, Ministry of Health, Dodoma, Tanzania

16 9 USAID Tanzania, Dar es Salaam, Tanzania

17 10 National Institute of Medical Research, Mwanza, Tanzania

18 11 Jhpiego, Baltimore, MD

19

20 \* Corresponding author: Katherine B. Rucinski

21 615 N. Wolfe Street, E5034

22 Baltimore, MD, USA

23 [rucinski@jhu.edu](mailto:rucinski@jhu.edu)

## 24 **Abstract**

25           Adolescent girls and young women (AGYW) continue to experience a high incidence of HIV in  
26 southern and eastern Africa, even in the context of large-scale HIV prevention interventions. In Tanzania,  
27 AGYW account for the largest proportion of new infections and have a higher risk of HIV acquisition  
28 than males of comparable age. We used routinely collected data from the PEPFAR/USAID-funded Sauti  
29 Project, a large combination HIV prevention program, to examine the relationship between transactional  
30 sex and sex with older partners among AGYW in Tanzania (2015-2020). Out-of-school AGYW 15-24  
31 years completed a vulnerability index and were tested for HIV. We estimated weighted prevalence ratios  
32 (PR) and 95% confidence intervals (CI) for the associations of transactional sex (sex exchanged for  
33 money/services/gifts outside of sex work) and sex with older partners ( $\geq 5$ -years older,  $\geq 10$ -years older)  
34 with prevalent HIV. We assessed potential synergism between exposures, and subgroup analyses explored  
35 associations among girls 15-19. 67,357 AGYW completed the vulnerability index and 14,873 had  
36 captured HIV testing records. Median age was 20 years (IQR 18-22). Transactional sex and age-disparate  
37 sex were common (35% and 28%, respectively); 13% of AGYW reported both behaviors. HIV prevalence  
38 was associated with both transactional sex (PR:1.28; 95% CI 1.00-1.63) and age-disparate sex (PR:1.26,  
39 95% CI 0.99-1.60). In common referent analysis, transactional sex remained strongly associated with  
40 HIV, even in the absence of age-disparate sex (PR 1.41; 95% CI 1.02-1.94). Evidence of statistical  
41 synergism was not present, suggesting both transactional sex and age-disparate sex operate through  
42 similar pathways to increase HIV risk. Increased specificity within HIV prevention programs is needed to  
43 better meet the sexual and reproductive health needs of AGYW at high risk of HIV in Tanzania, including  
44 investment in tailored youth-friendly strategies for AGYW who have been marginalized from the current  
45 HIV response.

46

47

## 48 **Introduction**

49 Over the last decade, substantial global investment and the expansion of critical prevention and  
50 treatment programs have resulted in overall declines in HIV incidence in countries across sub-Saharan  
51 Africa, including in Tanzania (1,2). Despite this progress, the burden of HIV remains high among key and  
52 other vulnerable populations such as adolescent girls and young women (AGYW) ages 15–24 (3). In  
53 2022, AGYW account for the highest proportion of new infections in Tanzania and remain at greater risk  
54 of infection relative to their male counterparts and other age groups (1,4,5).

55 Structural, economic and social dynamics in eastern and southern Africa, along with increased  
56 biological vulnerability, heighten young women’s risk of acquiring HIV (6,7). During adolescence and  
57 early adulthood, key transitions including physical, physiological, emotional, and social changes happen  
58 rapidly, affecting relationship formation and sexual decision making (8–11). As young people navigate  
59 these changes, gender norms that assign greater social and economic power to men create the material and  
60 ideological conditions that make it difficult for young women to refuse sex, negotiate condom use, or  
61 advocate for their own sexual interests (12–15). These dynamics may be heightened for young women  
62 living in poverty, including AGYW that live in food-insecure households and are unable to readily meet  
63 their basic needs from sources other than boyfriends or other sexual partners (16).

64 Sexual relationships with older male partners can increase the risk of HIV for AGYW in eastern  
65 and southern Africa. These relationships, which often comprise a sexual relationship with a male partner  
66 ten or more years older, can also lead to transmission of other sexually transmitted infections, early  
67 pregnancy, and child marriage (17,18). In South Africa, increasing differences in partner age are  
68 associated with risk of HIV infection, particularly for adolescents (19). Phylogenetic studies also indicate  
69 that men 25–40 years are the main source of HIV transmission for AGYW ages 15–25 (20). Similar  
70 findings have emerged in Kenya, Uganda, and Zimbabwe, with partner age differences as little as five  
71 years predictive of elevated HIV risk (21,22).

72 Transactional sex, defined by the exchange of sex for money or material support, has also been  
73 shown to be consistently associated with HIV acquisition (23–25). Transactional sex exists across  
74 a continuum for AGYW, with exchanges occurring within established partnerships, casual encounters, or  
75 within the context of more formalized sexual exchanges such as sex work (26,27). AGYW who report  
76 transactional sex have also reported a high prevalence of emotional and sexual violence, substance use,  
77 and condomless sex. When transactional sexual relationships occur with older males, these HIV risks can  
78 be further amplified given a higher prevalence of infection (28–30).

79 Study of transactional sex with older partners among AGYW in eastern and southern Africa has  
80 increased over the last five years, with inferences largely made using established research cohorts in  
81 countries such as South Africa, Uganda, and Kenya (23,31,32). While substantial qualitative work has  
82 been done to contextualize experiences of transactional sex in Tanzania, few empiric studies have  
83 quantitatively examined the relationship between transactional sex and HIV in the context of age-  
84 disparate relationships (22,27,33,34). Here, we use routinely collected data from a large combination HIV  
85 prevention program to better define the relationship between transactional sex and sex with older partners,  
86 and their joint impact on the HIV burden among AGYW in Tanzania.

87

## 88 **Methods**

### 89 **Study setting and program**

90 Data included in this analysis are from the Sauti Project, a large community-based HIV  
91 prevention program funded by the United States Agency for International Development (USAID) through  
92 the President’s Emergency Plan for AIDS Relief (PEPFAR). Implemented by Jhpiego in partnership with  
93 EngenderHealth, Pact, and the Tanzania National Institute for Medical Research, Sauti provided a core  
94 package of client-centered sexual and reproductive health services for key populations such as female sex  
95 workers and men who have sex with men (35–39). Sauti also delivered critical HIV-prevention services  
96 for vulnerable AGYW ages 15-24 within 14 regions of Tanzania between 2015 and 2020, and was also an

97 implementing partner of the DREAMS (Determined, Resilient, Empowered, AIDS-free, Mentored, and  
98 Safe) Initiative (**Figure 1**) (34,40). Programming delivered through Sauti for AGYW included biomedical  
99 services such as HIV testing and counseling, HIV case management, sexual risk assessments, family  
100 planning counseling and provision of contraception, screening for sexually transmitted infections (STI)  
101 and tuberculosis, nutritional assessments, and additional screening and referrals for substance use and  
102 gender-based violence. Further programming included behavioral change sessions and social protection  
103 interventions such as savings and loans clubs.

104

105 **Figure 1.** Sauti Project regions in Tanzania, 2015-2020

106

### 107 **Recruitment, eligibility, and procedures**

108 AGYW between the ages of 15 and 19 who were not in school full time (defined as not having  
109 attended classes more than 10 days in the last three months when not on public holidays or school  
110 vacation) and those aged 20-24 were recruited beginning in 2015. Venues included biomedical service-  
111 delivery points such as community-based HIV testing and counseling sites, workplaces, bars, guest  
112 houses, salons, markets, other venues previously identified as “hotspots” by the program, or AGYW-  
113 identified DREAMS safe spaces including religious houses and local government offices. Trained peer  
114 facilitators recruited AGYW from each site and assessed their eligibility for program services using a  
115 brief tool. This vulnerability index was adapted using existing tools from Tanzania and other countries in  
116 eastern and southern Africa (40). Methods to develop this index have been previously described (40).  
117 Briefly, measures included basic demographics, indicators of sexual experience including partner number  
118 and age, engagement in transactional sex, experiences of intimate partner violence, depression, and food  
119 insecurity, among others. The full index is reported in the Supplemental Materials (**S1 File**). Further,  
120 AGYW who accessed HIV testing and other biomedical services through Sauti also completed a health  
121 screening and service tool (HSST). Typically, these HIV testing visits occurred after AGYW had engaged

122 in behavior change sessions, economic empowerment sessions or other Sauti biomedical services.  
123 Information routinely collected through the HSST included basic demographics, screening for harmful  
124 drinking of alcohol and substance use, STI screening and treatment, and each AGYW's HIV testing  
125 results.

126

## 127 **Study population**

128 We assembled an analytic sample using data collected among AGYW through the vulnerability  
129 index and merged these data with biomedical HIV testing records collected through the HSST using  
130 participant-specific alphanumeric codes. Data were restricted to those AGYW that accessed services  
131 through Sauti between 2015-2019, and to those AGYW that were eligible for inclusion based on the  
132 established eligibility criteria as described. Notably, some AGYW who did not meet full eligibility  
133 requirements, including those that were still in school, were also referred for Sauti services if they  
134 expressed interest in engaging with the program; these AGYW were excluded from analyses. In some  
135 cases, AGYW had duplicate or repeat vulnerability index records. For these AGYW, we used the earliest  
136 record available in the database. Similarly, some AGYW had multiple HIV testing results reported over  
137 multiple years. For these AGYW, we used the date of first HIV testing record under the assumption that  
138 this visit occurred closet to initial program engagement. Young women ages 18-24 who identified as  
139 female sex workers were also excluded from analyses, as they were ineligible to complete the AGYW  
140 vulnerability index.

141

## 142 **Outcome and Exposures**

143 The primary outcome was prevalent HIV infection (yes/no), defined as a positive HIV test result  
144 documented through the Sauti HSST. Standard HIV testing comprised serial testing using the SD Bioline  
145 HIV-1/2 3.0 (Standard Diagnostics Inc., Suwon, Korea) and Uni-Gold HIV-1/2 (Trinity Biotech,  
146 Wicklow, Ireland) assays.

147

148           The two primary exposures included in this analysis were self-reported engagement in  
149 transactional sex and sex with older partners, both assessed through the vulnerability index. Transactional  
150 sex was defined as having ever engaged in any sex for money, services, or gifts (yes/no) (41). Age-  
151 disparate sex was defined as having engaged in sex with a partner five or more years older;  
152 intergenerational sex was defined as having ever engaged in sex with a partner ten or more years older  
153 (yes/no) (42,43).

154

### 155 **Statistical Analysis**

156           Demographics and characteristics of AGYW participants who completed the vulnerability index  
157 were summarized using proportions for categorical variables and medians for continuous variables. Chi-  
158 square tests were used to compare the differences in proportions between groups for categorical variables,  
159 and Wilcoxon signed-rank sum tests were used for continuous data ( $\alpha=0.05$ ).

160           We assessed differences in sample characteristics among participants who did and did not have a  
161 linked HIV testing result confirmed through the HSST. Among participants with an HIV testing result, we  
162 further assessed differences in history of transactional sex, comparing those who had engaged in  
163 transactional sex with those who reported never having engaged in transactional sex. We used a modified  
164 Poisson regression model with a robust variance estimator to estimate prevalence ratios (PR) and 95%  
165 confidence intervals (CI) for the association between transactional sex and prevalent HIV infection.  
166 Models were restricted to AGYW who were sexually active. A directed acyclic graph (DAG) was used to  
167 identify a minimally sufficient set of confounders for adjustment. Covariates in the minimally sufficient  
168 set included age, age-disparate sex/intergenerational sex, adult support, marital status, prior pregnancy,  
169 food insecurity, year, and early sexual debut. Models were similarly developed to assess associations  
170 between age-disparate sex and HIV, as well as intergenerational sex and HIV. Interaction was assessed  
171 between transactional sex and age-disparate sex, and between transactional sex and intergenerational sex

172 using common referent analysis and through comparison of observed and expected joint effects (44).

173 Subgroup analyses assessed main associations among adolescent girls ages 15-19.

174

## 175 **Weights**

176       Given missing HIV testing outcomes among those AGYW that did not have a linked record  
177 through the HSST, we derived non-response weights under the assumption that these data were missing at  
178 random (MAR) to address the possibility of selection bias and to improve the internal validity of our  
179 findings (45,46). Weights were created using the full database of 67,357 unique and eligible AGYW  
180 participants who completed the vulnerability index. An indicator variable for having an observed versus a  
181 missing HIV testing result was created and estimated as a function of a participant's measured covariates  
182 including age, partner status, prior pregnancy, food insecurity, sexual debut, experiences of violence,  
183 region, and survey version (year). Covariates were chosen based on preliminary analyses to identify  
184 patterns of missing information in these data, and we used multiple imputation by chained equations  
185 (MICE) to fill in missing data for all covariates (n=10 imputations) (47,48). We calculated and applied  
186 weights to all effect estimates for each series of imputations. Weights were stabilized by the marginal  
187 probability of having an observed HIV testing outcome and were truncated at the 5<sup>th</sup> and 95<sup>th</sup> percentiles  
188 to further improve stability. Weighted effect estimates and standard errors were pooled to calculate final  
189 PRs and 95% CIs, standardized to the full population of AGYW who completed the vulnerability index.

190       All analyses were conducted using SAS 9.4 (SAS Institute, Cary, NC).

191

## 192 **Ethics**

193       The National Institute for Medical Research and the Ministry of Health Community  
194 Development, Gender, Elderly and Children of the United Republic of Tanzania provided ethical  
195 clearance for primary data collection activities under Sauti. The vulnerability index was administered in  
196 the context of routine service delivery, and all participants provided verbal informed consent. Parental



197 consent was only sought for HIV testing if the participant was under the age of 18 in accordance with  
198 Tanzania law. Minors under the age of 18 who were parents were considered emancipated, and thus did  
199 not require parental consent. Ethical approval for the use of de-identified routine data was provided by the  
200 National Institute for Medical Research (NIMR/HQ/R.8c/Vol.1/678) and the Johns Hopkins Institutional  
201 Review Board (IRB No. 00006673).

202

## 203 **RESULTS**

### 204 **Sample characteristics**

205 A total of 67,357 unique AGYW participants completed the Sauti vulnerability index between  
206 2015-2019 (**Figure 2**). Based on their age and schooling status, 65,185 were eligible for inclusion and  
207 retained in further analyses. Of these AGYW participants, 19,748 (30.4%) lived in Dar es Salaam, 11,240  
208 (17.3%) in Mbeya, and 8,891 (13.7%) in Shinyanga; the remaining participants were from Arusha,  
209 Dodoma, Iringa, Kilimanjaro, Morogoro, Njombe, Songwe, and Tabora.

210

211 **Figure 2.** Construction of analytic sample including 14,873 AGYW using program data from the Sauti  
212 Project, 2015-2019

213

214 A total of 14,873 (22.8%) AGYW were able to be linked to their HIV testing record through the  
215 HSST using a unique identifier. Of these 14,873 AGYW, the median age was 20 years (IQR 15, 24)  
216 (**Table 1**). One-fifth (20.9%) were married. Almost half (40.7%) had previously been pregnant. Lifetime  
217 experience of transactional sex and age-disparate sex were common (35.6% and 39.1%, respectively). A  
218 total of 278 (1.9%) AGYW were living with HIV. Characteristics differed significantly by experience of  
219 transactional sex.

220

221 **Table 1.** Characteristics of 14,873 AGYW accessing combination HIV prevention services in Tanzania  
 222 through the Sauti Project, 2015-2019<sup>a</sup>

|                                                | Overall<br>N=14,873 |               | No transactional<br>sex<br>N=9,521 (65.4%) |               | Transactional sex<br>N=5,047 (34.6%) |               |             |
|------------------------------------------------|---------------------|---------------|--------------------------------------------|---------------|--------------------------------------|---------------|-------------|
|                                                | Median              | IQR           | Median                                     | IQR           | Median                               | IQR           | p-<br>value |
| Age, years                                     | 20.0                | 18.0-<br>22.0 | 20.0                                       | 18.0-<br>22.0 | 21.0                                 | 19.0-<br>23.0 | <.001       |
|                                                | n                   | %             | n                                          | %             | n                                    | %             | p-<br>value |
| Married                                        | 3,063               | 20.9          | 1,916                                      | 20.5          | 1,096                                | 22.0          | <.001       |
| Adult support <sup>b</sup>                     | 7,949               | 55.0          | 4,381                                      | 47.1          | 3,482                                | 70.2          | <.001       |
| Food insecurity <sup>c</sup>                   | 4,302               | 29.0          | 2,081                                      | 22.3          | 2,179                                | 44.4          | <.001       |
| Ever pregnant                                  | 6,035               | 40.7          | 3,369                                      | 35.4          | 2,587                                | 51.3          | <.001       |
| Sexual debut <15 years                         | 2,544               | 17.7          | 1,099                                      | 11.8          | 1,412                                | 28.7          | <.001       |
| Sexual partner >5 years older                  | 4,162               | 28.3          | 2,156                                      | 22.8          | 1,953                                | 39.1          | <.001       |
| Sexually active, ever                          | 12,730              | 86.4          | 7,509                                      | 79.0          | 5,006                                | 99.9          | <.001       |
| Sexually active, last 12 months                | 10,895              | 76.1          | 6,230                                      | 67.0          | 4,522                                | 92.9          | <.001       |
| Using modern contraception <sup>d</sup>        | 4,774               | 36.8          | 2,663                                      | 31.5          | 2,111                                | 46.5          | <.001       |
| Condomless sex, last 12<br>months <sup>e</sup> | 791                 | 74.1          | 472                                        | 68.0          | 319                                  | 85.5          | <.001       |
| >1 partner, last 12 months                     | 5,014               | 34.8          | 1,777                                      | 19.0          | 3,127                                | 65.4          | <.001       |
| Sexual violence, ever                          | 1,901               | 13.1          | 771                                        | 8.2           | 1,109                                | 22.4          | <.001       |
| Sex with HIV+ partner, last 12<br>months       | 411                 | 2.9           | 186                                        | 2.0           | 216                                  | 4.4           | <.001       |
| Prevalent HIV                                  | 278                 | 1.9           | 150                                        | 1.6           | 125                                  | 2.5           | .006        |

223 <sup>a</sup> Missing. transactional sex: 305 (2.1%); married: 244 (1.6%); adult support: 427 (2.9%); food insecurity: 484 (3.3%); pregnancy: 25  
 224 (0.2%); sexual debut: 470 (3.2%); partner age: 153 (1.0%); ever sexually active: 547 (3.7%); sexually active in the last year: 139  
 225 (0.9%); contraception: 659 (4.8%); number of sex partners: 438 (2.9%); sexual violence: 390 (2.6%); sex with HIV+ partner: 438  
 226 (2.9%); HIV: 341 (2.3%)

227 <sup>b</sup> Has an adult in the household or community who provides unconditional emotional and/ or financial support

228 <sup>c</sup> Could not afford to buy food or there was not enough food to eat at home

229 <sup>d</sup> Use of modern contraception asked on versions 1 and 2 of the index

230 <sup>e</sup> Used a condom never, almost never, or sometimes when having vaginal sex; asked on version 3 of the index

231

232 The remaining 50,312 participants did not have a matching HIV testing record in the database. Compared  
 233 to those for whom an HIV testing record was not available, AGYW with observed HIV testing outcomes

234 were less likely to be married (20.9% vs. 23.6%;  $p < 0.001$ ), to have experienced recent food insecurity  
 235 (29.9% vs. 40.8%;  $p < 0.001$ ), to have ever experienced sexual violence (13.1% vs. 21.8%;  $p < 0.001$ ), and  
 236 to have engaged in transactional sex (37.0% vs. 45.1%  $p < 0.001$ ). Characteristics among AGYW  
 237 participants with and without a linked HIV testing record are reported in **S1 Table**.

238

### 239 **Transactional sex and HIV**

240 Lifetime experience of transactional sex was associated with HIV prevalence in unadjusted (PR: 1.41;  
 241 95% CI 1.10, 1.80) and adjusted models (PR: 1.34; 95% CI 1.04, 1.74) (**Table 2**). Weighted estimates  
 242 similarly demonstrated a population-level association between transactional sex and HIV (PR: 1.28; 95%  
 243 CI 1.00, 1.63).

244

245 **Table 2.** Unadjusted, adjusted, and weighted associations of A) transactional sex with HIV prevalence; B)  
 246 age-disparate sex<sup>a</sup> with HIV prevalence; and C) intergenerational sex<sup>b</sup> with HIV prevalence among  
 247 12,730 sexually active AGYW accessing combination HIV services in Tanzania through the Sauti Project,  
 248 2015-2019<sup>c,d</sup>

|                             | Unadjusted PR (95% CI) | Adjusted PR (95% CI) | Weighted PR (95% CI) |
|-----------------------------|------------------------|----------------------|----------------------|
| A. No transactional sex     | 1 (REF.)               | 1 (REF.)             | 1 (REF.)             |
| Transactional sex           | 1.41 (1.11, 1.80)      | 1.34 (1.04, 1.74)    | 1.28 (1.00, 1.63)    |
| B. No age-disparate sex     | 1 (REF.)               | 1 (REF.)             | 1 (REF.)             |
| Age-disparate sex           | 1.20 (0.94, 1.55)      | 1.13 (0.88, 1.46)    | 1.26 (0.99, 1.60)    |
| C. No intergenerational sex | 1 (REF.)               | 1 (REF.)             | 1 (REF.)             |
| Intergenerational sex       | 1.09 (0.71, 1.67)      | 0.97 (0.64, 1.47)    | 1.11 (0.77, 1.60)    |

249 Abbreviations. PR: prevalence ratio, CI: confidence interval

250 <sup>a</sup> Defined as a sexual relationship with a male partner  $\geq 5$  years older than the participating AGYW.

251 <sup>b</sup> Defined as a sexual relationship with a male partner  $\geq 10$  years older than the participating AGYW.

252 <sup>c</sup> Among 12,730 AGYW who reported having ever engaged in sex, of whom 309 (2.4%) were missing measures of transactional sex  
 253 and/or partner age and were excluded from analysis.

254 <sup>d</sup> A directed acyclic graph (DAG) was used to identify a minimally sufficient adjustment set of covariates, and potential confounders  
 255 were included based on prior literature. Confounders included in the adjustment set were age, adult support, marital status, prior

256 pregnancy, food insecurity, early sexual debut, and survey version. For model A, intergenerational sex was also included as a  
 257 potential confounder.

258

### 259 **Older partners and HIV**

260 There was a moderate association between age-disparate sex and HIV in unadjusted analysis (PR: 1.20;  
 261 95% CI 0.94, 1.55) that was attenuated when adjusted for potential confounders (PR: 1.15; 95% CI 0.89,  
 262 1.50). In weighted analysis, age-disparate sex was associated with a 26% increase in HIV prevalence (PR:  
 263 1.26; 95% CI 0.99, 1.60). Intergenerational sex was not strongly associated with HIV prevalence in  
 264 unadjusted (PR: 1.09; 95% CI 0.71, 1.67), adjusted (PR: 1.00; 95% CI 0.65, 1.53), or weighted models  
 265 (PR: 1.11, 95% CI 0.77, 1.60).

266

### 267 **Combined association of transactional sex and sex with older partners**

268 In common referent analysis, AGYW who engaged in transactional sex in the absence of age-disparate  
 269 partners had 1.41 (95% CI 1.02, 1.94) times the prevalence of HIV compared to AGYW who reported  
 270 neither behavior (**Table 3**). Conversely, age-disparate sex was not associated with HIV prevalence in the  
 271 absence of transactional sex (PR: 1.19, 95% CI 0.81, 1.67). The prevalence ratio for those who reported  
 272 both transactional sex and age-disparate sex was 1.45 (95% CI 1.01, 2.08), which was less than the  
 273 expected prevalence ratio using both additive and multiplicative criteria.

274

275 **Table 3.** Interaction between a) transactional sex and age-disparate sex<sup>a</sup> and b) transactional sex and  
 276 intergenerational sex<sup>b</sup> on HIV prevalence among 12,730 sexually active AGYW in Tanzania, 2015-2019<sup>c</sup>

|                                        | No transactional sex        | Transactional sex           |
|----------------------------------------|-----------------------------|-----------------------------|
| <b>A. Age-disparate sex strata</b>     | <b>Adjusted PR (95% CI)</b> | <b>Adjusted PR (95% CI)</b> |
| No age-disparate sex                   | 1.00 (REF)                  | 1.41 (1.02, 1.94)           |
| Age-disparate sex                      | 1.16 (0.81, 1.67)           | 1.45 (1.01, 2.08)           |
| <b>B. Intergenerational sex strata</b> | <b>Adjusted PR (95% CI)</b> | <b>Adjusted PR (95% CI)</b> |
| No intergenerational sex               | 1.00 (REF)                  | 1.30 (1.00, 1.70)           |

Intergenerational sex 0.78 (0.40, 1.55) 1.55 (0.90, 2.65)

277 Abbreviations. PR: prevalence ratio, CI: confidence interval

278 <sup>a</sup> Defined as a sexual relationship with a male partner ≥5 years older than the participating AGYW.

279 <sup>b</sup> Defined as a sexual relationship with a male partner ≥10 years older than the participating AGYW.

280 <sup>c</sup> Confounders included in each adjustment set were age, adult support, marital status, prior pregnancy, food insecurity, early sexual  
281 debut, and survey version.

282

### 283 Subgroup analysis among AGYW age 15-19

284 Transactional sex was also common among AGYW age ≤19 (**Table 4**). Transactional sex, age-disparate  
285 sex, and intergenerational sex were not significantly associated with HIV prevalence among younger  
286 AGYW (**S2 Table**).

287

288 **Table 4.** Characteristics of 5,816 adolescent girls ages 15-19 accessing combination HIV prevention  
289 services in Tanzania through the Sauti Project, 2015-2019<sup>a</sup>

|                               | Overall<br>N=5,816 |               | No transactional<br>sex<br>N=3,879 (68.2%) |               | Transactional sex<br>N=1,813 (31.9%) |               |             |
|-------------------------------|--------------------|---------------|--------------------------------------------|---------------|--------------------------------------|---------------|-------------|
|                               | Median             | IQR           | Median                                     | IQR           | Median                               | IQR           | p-<br>value |
| Age, years                    | 18.0               | 17.0-<br>19.0 | 18.0                                       | 17.0-<br>19.0 | 18.0                                 | 17.0-<br>19.0 | <.001       |
|                               | n                  | %             | n                                          | %             | n                                    | %             | p-<br>value |
| Married                       | 553                | 9.7           | 320                                        | 8.4           | 219                                  | 12.3          | <.001       |
| Adult support <sup>b</sup>    | 3,015              | 53.5          | 1,758                                      | 46.5          | 1,230                                | 68.9          | <.001       |
| Food insecurity <sup>c</sup>  | 1,735              | 30.9          | 899                                        | 23.8          | 820                                  | 46.2          | <.001       |
| Ever pregnant                 | 1,321              | 22.7          | 679                                        | 17.5          | 627                                  | 34.6          | <.001       |
| Sexual debut <15 years        | 1,310              | 23.2          | 594                                        | 15.6          | 702                                  | 39.5          | <.001       |
| Sexual partner >5 years older | 1,282              | 22.3          | 648                                        | 16.8          | 617                                  | 34.4          | <.001       |
| Sexually active, ever         | 4,272              | 74.3          | 2,399                                      | 61.9          | 1,800                                | 100.0         | <.001       |

|                                             |       |      |       |      |       |      |       |
|---------------------------------------------|-------|------|-------|------|-------|------|-------|
| Sexually active, last 12 months             | 3,576 | 63.7 | 1,913 | 50.3 | 1,618 | 92.1 | <.001 |
| Using modern contraception <sup>d</sup>     | 1,363 | 26.8 | 706   | 20.6 | 657   | 39.6 | <.001 |
| Condomless sex, last 12 months <sup>e</sup> | 222   | 70.3 | 136   | 63.3 | 86    | 85.1 | <.001 |
| >1 partner, last 12 months                  | 1,657 | 29.4 | 577   | 14.1 | 1,074 | 60.9 | <.001 |
| >2 partners, last 12 months                 | 526   | 9.3  | 162   | 4.2  | 363   | 20.6 | <.001 |
| Sexual violence, ever                       | 673   | 11.9 | 307   | 8.1  | 355   | 19.9 | <.001 |
| Sex with HIV+ partner, last 12 months       | 163   | 2.9  | 76    | 2.0  | 8     | 4.6  | <.001 |
| Prevalent HIV                               | 65    | 1.2  | 34    | 0.9  | 29    | 1.7  | .002  |

290 <sup>a</sup> Missing. Married: 103 (1.8%); adult support: 185 (3.2%); food insecurity: 202 (3.5%); pregnancy: 5 (0.1%); sexual debut: 180  
 291 (3.1%); partner age: 58 (1.0%); ever sexually active: 68 (1.2%); sexually active in the last year 204 (3.5%); number of sex partners:  
 292 174 (3.0%); sexual violence: 176 (3.0%); sex with HIV+ partner: 165 (2.8%); HIV: 191 (3.3%)

293 <sup>b</sup> Has an adult in the household or community who provides unconditional emotional and/ or financial support

294 <sup>c</sup> Could not afford to buy food or there was not enough food to eat at home

295 <sup>c</sup> Could not afford to buy food or there was not enough food to eat at home

296 <sup>d</sup> Use of modern contraception asked on versions 1 and 2 of the index

297 <sup>e</sup> Used a condom never, almost never, or sometimes when having vaginal sex; asked on version 3 of the index

298

## 299 **DISCUSSION**

300 In this study, we examined the relationship between HIV burden and transactional sex among over 14,000  
 301 AGYW accessing real-world HIV prevention services through the PEPFAR/USAID-funded Sauti Project  
 302 in Tanzania. Transactional exchanges of money, services, or gifts for sex were common among AGYW  
 303 enrolled in Sauti programming, including among girls as young as age 15. These exchanges occurred  
 304 among AGYW who were mostly unmarried, had previously been pregnant, and were receiving emotional  
 305 and financial support from older adults, including family and other community members. AGYW who  
 306 reported transactional sex had an elevated burden of HIV, and transactional sex was strongly associated  
 307 with HIV prevalence even in the absence of older partners. Given the multiple social and structural  
 308 vulnerabilities that can lead to transactional sexual relationships, including those with older partners, there

309 is need to identify HIV prevention approaches that are more responsive to AGYW who may necessitate  
310 tailored and targeted programmatic support early in adolescence.

311  
312 The burden of HIV was not evenly distributed among AGYW in this analysis, with estimates of HIV  
313 prevalence the highest among young women who reported both transactional sex and sexual relationships  
314 with older partners. While intergenerational and transactional sex are often conceptualized in the literature  
315 as compatible risk factors for HIV acquisition (23,24,29,49), few studies have explored the extent to  
316 which asymmetry in partner age and transactional sex interact to increase HIV-associated vulnerability  
317 (28). Consistent with our findings, one case-control study in South Africa found women who reported  
318 both transactional sex and intergenerational partners had nearly twice the odds of HIV compared to  
319 women who reported either experience alone (22). These findings contribute to a growing body of  
320 literature that aim to further distinguish heterogeneities of risk among AGYW and more effectively guide  
321 HIV prevention programming. Importantly, early findings from the DREAMS initiative have  
322 demonstrated little to no improvement in reducing HIV incidence across multiple countries in southern  
323 and eastern Africa (50). Our results suggest that aligning HIV prevention services with the needs of  
324 AGYW who necessitate more targeted and intense approaches- such as young women who engage in  
325 resource-driven transactional relationships with older partners- are needed to deliver meaningful  
326 reductions in incidence for AGYW moving forward. Approaches may include economic empowerment  
327 for broader social asset building (51), integrated family planning and maternal health services to support  
328 the needs of adolescent mothers (52), as well as vocational training to facilitate employment and improve  
329 income (53), among others.

330  
331 Experiences of transactional sex are often predicated on structural vulnerabilities, gender norms, and  
332 power differentials that motivate AGYW to engage in resource-driven sexual relationships. The high  
333 burden of food insecurity, prior pregnancy, and sexual violence among AGYW in this study, particularly  
334 among those reporting transactional sex, reinforce the larger social and structural determinants of HIV

335 that underly sexual exchanges and increase risk of infection. For AGYW living in poverty, transactional  
336 sex offers a means to provide food, clothing, shelter and other resources, and can establish pathways to  
337 support and security. These more explicit transactional relationships may be even riskier for younger  
338 AGYW, who may be further marginalized or restricted from accessing sexual and reproductive health  
339 services due to their age (54). While transactional sex and sex with older partners were not strongly  
340 associated with HIV prevalence among adolescents in subgroup analyses, an alarmingly high prevalence  
341 of condomless sex among girls as young as 15 engaged in transactional sex indicates a potential high  
342 incidence of infection in the context of these larger social and structural factors (7,49,55).

343  
344 AGYW are broadly considered a priority population for HIV epidemic control, but not all AGYW have a  
345 high risk of acquiring HIV. While young women >18 years who identified as female sex workers were  
346 explicitly excluded from analyses, a high prevalence of condomless sex, violence, and food insecurity  
347 among adolescent girls accessing Sauti services suggests some overlap with sex work. Notably, few  
348 programs in southern and eastern Africa have evaluated the impact of tailored HIV programming for  
349 young women who sell sex (56–58). In Zimbabwe, DREAMS programming that implemented  
350 community mobilization and social protection interventions alongside dedicated HIV testing and PrEP for  
351 young women who sell sex found increased uptake of clinical services; however, no effect on HIV  
352 incidence was observed (59). Additional efforts in Zimbabwe, Mozambique, and Kenya have worked to  
353 engage young women who sell sex, but more broadly this population remains under-represented in both  
354 research and programs (58,60). This gap may be further perpetuated by issues of identity. Young women  
355 who sell sex may not identify as sex workers until they are older (61,62), but may be marginalized from  
356 existing AGYW HIV prevention and treatment programs (16,63,64). They may also feel ostracized by  
357 older sex workers, thus limiting the extent to which they engage in FSW HIV prevention and treatment  
358 efforts such as drop-in centers. Thus, there is an urgent need to engage this population in both research  
359 and program design efforts, and to grow the evidence base of effective interventions for young women  
360 who engage in necessity-driven transactional sex.



361  
362 A strength of this study was our ability to leverage a large database of observational data collected during  
363 the delivery of routine services through the Sauti Project in Tanzania. In general, population-level  
364 inferences made using programmatic data tend to be more representative than research data, which  
365 generally are collected using narrow eligibility criteria that may threaten external validity (65). Well-  
366 controlled research studies may also exclude adolescents who are most at risk for poor sexual and  
367 reproductive health outcomes such as those who live and work on the street, potentially limiting  
368 generalizability of findings (66,67). Yet programmatic data remain a relatively under-utilized resource to  
369 examine the effectiveness of HIV-related interventions and implementation strategies for key populations  
370 (68–71). As programs continue to roll out biomedical prevention interventions for AGYW such as long-  
371 acting PrEP, program data offer an opportunity to keep pace and quickly tailor and adapt implementation  
372 strategies, thus providing for a more nuanced and more efficient HIV response.

373  
374 This study also had several limitations. Our use of program data necessitated the merging of multiple  
375 databases. Rigorous quality assurance procedures were implemented throughout the duration of the  
376 program; however, challenges with unique identifiers limited the number of AGYW who could be linked  
377 across program records. We used non-response weights to try and improve internal validity under the  
378 assumption these unlinked records were MAR given the observed patterns in which the “missingness” of  
379 records occurred. Additionally, changes to the vulnerability index and question format during program  
380 implementation precluded us from fully assessing key measures including frequency of condom use,  
381 which may have provided additional insight into behavioral risks within transactional sexual partnerships.  
382 Further, we were also limited by temporality and were unable to determine if transactional or  
383 intergenerational sexual partnerships were more recent, and whether HIV was sexually or perinatally  
384 acquired. Nevertheless, these findings provide critical insights into multiple relationship dynamics among  
385 AGYW in Tanzania. Given relatively few research data available for AGYW in the context of HIV

386 prevention and treatment uptake in Tanzania (72), these estimates fill an epidemiologic gap and can  
387 inform targets for intervention moving forward.

388

### 389 **Conclusions**

390 Declines in HIV incidence among AGYW over the last several years have been smaller than expected  
391 given substantial investments in HIV programming for AGYW in eastern and southern Africa through  
392 large combination HIV prevention programs such as DREAMS. This study contributes to a growing body  
393 of evidence that HIV risks among AGYW are not homogenous, and that additional implementation  
394 strategies are needed to link AGYW at high-risk of HIV to behavioral, structural and biomedical  
395 prevention interventions such as PrEP. These efforts likely include increased specificity among AGYW  
396 programs to better meet the sexual and reproductive health needs of AGYW at high risk of HIV, but also  
397 investment in tailored youth-friendly strategies for AGYW who have been marginalized from the current  
398 HIV response, including young women who engage in sexual relationships with older partners and those  
399 who sell sex.

400

### 401 **Acknowledgements**

402 The authors wish to thank the participants that engaged with the Sauti Project, as well as the Sauti  
403 program staff that worked diligently for many years to deliver critical health services for key and priority  
404 populations across Tanzania.

## 405 **References**

- 406 1. Joint United Nations Programme on HIV/AIDS. UNAIDS Data 2021 [Internet]. Geneva,  
407 Switzerland; [cited 2022 Jan 4]. Available from:  
408 [https://www.unaids.org/en/resources/documents/2021/2021\\_unaids\\_data](https://www.unaids.org/en/resources/documents/2021/2021_unaids_data)
- 409 2. The DREAMS core package of interventions: A comprehensive approach to preventing HIV  
410 among adolescent girls and young women [Internet]. [cited 2020 Jul 6]. Available from:  
411 <https://journals.plos.org/plosone/article?id=10.1371/journal.pone.0208167>
- 412 3. Adolescents-HIV-Eastern-Southern-Africa-2021.pdf [Internet]. [cited 2022 Jun 16].  
413 Available from: [https://www.unicef.org/esa/media/8791/file/Adolescents-HIV-Eastern-](https://www.unicef.org/esa/media/8791/file/Adolescents-HIV-Eastern-Southern-Africa-2021.pdf)  
414 [Southern-Africa-2021.pdf](https://www.unicef.org/esa/media/8791/file/Adolescents-HIV-Eastern-Southern-Africa-2021.pdf)
- 415 4. PHIA Project [Internet]. [cited 2022 Jan 5]. Tanzania. Available from:  
416 <https://phia.icap.columbia.edu/countries/tanzania/>
- 417 5. Brown K. Status of HIV Epidemic Control Among Adolescent Girls and Young Women  
418 Aged 15–24 Years — Seven African Countries, 2015–2017. *MMWR Morb Mortal Wkly*  
419 *Rep* [Internet]. 2018 [cited 2020 Jul 5];67. Available from:  
420 <https://www.cdc.gov/mmwr/volumes/67/wr/mm6701a6.htm>
- 421 6. Harrison A, Colvin CJ, Kuo C, Swartz A, Lurie M. Sustained High HIV Incidence in Young  
422 Women in Southern Africa: Social, Behavioral, and Structural Factors and Emerging  
423 Intervention Approaches. *Curr HIV/AIDS Rep*. 2015 Jun;12(2):207–15.
- 424 7. Comins CA, Rucinski KB, Baral S, Abebe SA, Mulu A, Schwartz SR. Vulnerability profiles  
425 and prevalence of HIV and other sexually transmitted infections among adolescent girls and  
426 young women in Ethiopia: A latent class analysis. *PloS One*. 2020;15(5):e0232598.
- 427 8. Delany-Moretlwe S, Cowan FM, Busza J, Bolton-Moore C, Kelley K, Fairlie L. Providing  
428 comprehensive health services for young key populations: needs, barriers and gaps. *J Int*  
429 *AIDS Soc*. 2015;18(2 Suppl 1):19833.
- 430 9. Pettifor AE, Measham DM, Rees HV, Padian NS. Sexual power and HIV risk, South Africa.  
431 *Emerg Infect Dis*. 2004;10(11):1996.
- 432 10. Brook DW, Morojele NK, Zhang C, Brook JS. South African adolescents: pathways to risky  
433 sexual behavior. *AIDS Educ Prev*. 2006;18(3):259–72.
- 434 11. Sanders RA. Adolescent psychosocial, social, and cognitive development. *Pediatr Rev*. 2013  
435 Aug;34(8):354–8; quiz 358–9.
- 436 12. Jewkes RK, Dunkle K, Nduna M, Shai N. Intimate partner violence, relationship power  
437 inequity, and incidence of HIV infection in young women in South Africa: a cohort study.  
438 *The Lancet*. 2010 Jul 3;376(9734):41–8.

- 439 13. Harrison A, O'Sullivan LF, Hoffman S, Dolezal C, Morrell R. Gender role and relationship  
440 norms among young adults in South Africa: measuring the context of masculinity and HIV  
441 risk. *J Urban Health Bull N Y Acad Med*. 2006 Jul;83(4):709–22.
- 442 14. Gottert A, Barrington C, McNaughton-Reyes HL, Maman S, MacPhail C, Lippman SA, et al.  
443 Gender Norms, Gender Role Conflict/Stress and HIV Risk Behaviors Among Men in  
444 Mpumalanga, South Africa. *AIDS Behav*. 2018 Jun 1;22(6):1858–69.
- 445 15. Palermo T, Chzhen Y, Balvin N, Kajula L, Palermo T, Groppo V, et al. Examining  
446 determinants of gender attitudes: evidence among Tanzanian adolescents. *BMC Womens*  
447 *Health*. 2020 Sep 10;20(1):195.
- 448 16. Rucinski KB, Schwartz SR, Mishra S, Phaswana-Mafuya N, Diouf D, Mothopeng T, et al.  
449 High HIV Prevalence and Low HIV-Service Engagement Among Young Women Who Sell  
450 Sex: A Pooled Analysis Across 9 Sub-Saharan African Countries. *J Acquir Immune Defic*  
451 *Syndr* 1999. 2020 Oct 1;85(2):148–55.
- 452 17. Hokororo A, Kihunrwa A, Hoekstra P, Kalluvya SE, Changalucha JM, Fitzgerald DW, et al.  
453 High prevalence of sexually transmitted infections in pregnant adolescent girls in Tanzania: a  
454 multi-community cross-sectional study. *Sex Transm Infect*. 2015 Nov;91(7):473–8.
- 455 18. Erulkar A, Medhin G, Weissman E. The impact and cost of child marriage prevention in  
456 rural Tanzania. *Poverty Gend Youth* [Internet]. 2017 Jan 1; Available from:  
457 [https://knowledgecommons.popcouncil.org/departments\\_sbsr-pgy/536](https://knowledgecommons.popcouncil.org/departments_sbsr-pgy/536)
- 458 19. Topazian HM, Stoner MCD, Edwards JK, Kahn K, Gómez-Olivé FX, Twine R, et al.  
459 Variations in HIV Risk by Young Women's Age and Partner Age Disparity in Rural South  
460 Africa (HPTN 068). *J Acquir Immune Defic Syndr* 1999. 2020 Apr 1;83(4):350–6.
- 461 20. de Oliveira T, Kharsany ABM, Gräf T, Cawood C, Khanyile D, Grobler A, et al.  
462 Transmission networks and risk of HIV infection in KwaZulu-Natal, South Africa: a  
463 community-wide phylogenetic study. *Lancet HIV*. 2017 Jan;4(1):e41–50.
- 464 21. Okiring J, Getahun M, Gutin SA, Lebu S, Lee J, Maeri I, et al. Sexual partnership  
465 concurrency and age disparities associated with sexually transmitted infection and risk  
466 behavior in rural communities in Kenya and Uganda. *Int J Infect Dis*. 2022 Jul 1;120:158–  
467 67.
- 468 22. McCloskey LA, Eloff I, Doran K. Determinants of intergenerational sexual relationships and  
469 HIV risk among South African women outpatients in Gauteng. *AIDS Care*. 2021  
470 May;33(5):654–62.
- 471 23. Kilburn K, Ranganathan M, Stoner MCD, Hughes JP, MacPhail C, Agyei Y, et al.  
472 Transactional sex and incident HIV infection in a cohort of young women from rural South  
473 Africa. *AIDS Lond Engl*. 2018;32(12):1669–77.
- 474 24. Jewkes R, Dunkle K, Nduna M, Shai NJ. Transactional sex and HIV incidence in a cohort of  
475 young women in the stepping stones trial. *J AIDS Clin Res*. 2012;3(5).

- 476 25. Wamoyi J, Stobeanau K, Bobrova N, Abramsky T, Watts C. Transactional sex and risk for  
477 HIV infection in sub-Saharan Africa: a systematic review and meta-analysis. *J Int AIDS Soc.*  
478 2016;19(1):20992.
- 479 26. Stoebenau K, Heise L, Wamoyi J, Bobrova N. Revisiting the understanding of “transactional  
480 sex” in sub-Saharan Africa: A review and synthesis of the literature. *Soc Sci Med.* 2016 Nov  
481 1;168:186–97.
- 482 27. Wamoyi J, Heise L, Meiksin R, Kyegombe N, Nyato D, Buller AM. Is transactional sex  
483 exploitative? A social norms perspective, with implications for interventions with adolescent  
484 girls and young women in Tanzania. Fielding-Miller RK, editor. *PLOS ONE.* 2019 Apr  
485 2;14(4):e0214366.
- 486 28. Ranganathan M, Kilburn K, Stoner MCD, Hughes JP, MacPhail C, Gomez-Olive FX, et al.  
487 The Mediating Role of Partner Selection in the Association Between Transactional Sex and  
488 HIV Incidence Among Young Women. *J Acquir Immune Defic Syndr* 1999. 2020  
489 01;83(2):103–10.
- 490 29. Stoner MCD, Nguyen N, Kilburn K, Gómez-Olivé FX, Edwards JK, Selin A, et al. Age-  
491 disparate partnerships and incident HIV infection in adolescent girls and young women in  
492 rural South Africa. *AIDS Lond Engl.* 2019 27;33(1):83–91.
- 493 30. Rucinski KB, Kilburn K, delong, Stephanie Marie, Gómez-Olivé FX, Kahn K, Twine R, et  
494 al. Developmental trajectories of transactional sex and age-disparate relationships during  
495 adolescence: An HPTN 068 analysis. 2019 Jul; Mexico City, Mexo.
- 496 31. Full article: Sexual health of adolescent girls and young women in Central Uganda:  
497 exploring perceived coercive aspects of transactional sex [Internet]. [cited 2022 Jul 15].  
498 Available from: <https://www.tandfonline.com/doi/full/10.1080/26410397.2019.1700770>
- 499 32. Becker ML, Bhattacharjee P, Blanchard JF, Cheuk E, Isac S, Musyoki HK, et al.  
500 Vulnerabilities at First Sex and Their Association With Lifetime Gender-Based Violence and  
501 HIV Prevalence Among Adolescent Girls and Young Women Engaged in Sex Work,  
502 Transactional Sex, and Casual Sex in Kenya. *J Acquir Immune Defic Syndr* 1999. 2018  
503 01;79(3):296–304.
- 504 33. Wamoyi J, Wight D, Plummer M, Mshana GH, Ross D. Transactional sex amongst young  
505 people in rural northern Tanzania: an ethnography of young women’s motivations and  
506 negotiation. *Reprod Health.* 2010 Apr 29;7(1):2.
- 507 34. Gichane MW, Wamoyi J, Atkins K, Balvanz P, Maman S, Majani E, et al. The influence of  
508 cash transfers on engagement in transactional sex and partner choice among adolescent girls  
509 and young women in Northwest Tanzania. *Cult Health Sex.* 2020 Sep 16;1–15.
- 510 35. Mbita G, Mwanamsangu A, Plotkin M, Casalini C, Shao A, Lija G, et al. Consistent Condom  
511 Use and Dual Protection Among Female Sex Workers: Surveillance Findings from a Large-  
512 Scale, Community-Based Combination HIV Prevention Program in Tanzania. *AIDS Behav.*  
513 2019 Aug 23;

- 514 36. Mbita G, Komba AN, Casalini C, Bazant E, Curran K, Christensen A, et al. Predictors of  
515 HIV Among 1 Million Clients in High-Risk Male Populations in Tanzania. *AIDS Behav.*  
516 2022 Apr 1;1–14.
- 517 37. Nyato D, Nnko S, Komba A, Kuringe E, Plotkin M, Mbita G, et al. Facilitators and barriers  
518 to linkage to HIV care and treatment among female sex workers in a community-based HIV  
519 prevention intervention in Tanzania: A qualitative study. *PLOS ONE.* 2019 Nov  
520 19;14(11):e0219032.
- 521 38. Kuringe E, Materu J, Nyato D, Majani E, Ngeni F, Shao A, et al. Prevalence and correlates  
522 of depression and anxiety symptoms among out-of-school adolescent girls and young women  
523 in Tanzania: A cross-sectional study. *PLOS ONE.* 2019 Aug 16;14(8):e0221053.
- 524 39. Wambura M, Drake M, Kuringe E, Majani E, Nyato D, Casalini C, et al. Cash Transfer to  
525 Adolescent Girls and Young Women to Reduce Sexual Risk Behavior (CARE): Protocol for  
526 a Cluster Randomized Controlled Trial. *JMIR Res Protoc.* 2019 Dec 20;8(12):e14696.
- 527 40. Han H, Yang F, Murray S, Mbita G, Bangser M, Rucinski K, et al. Characterizing a sexual  
528 health and HIV risk stratification scale for sexually active adolescent girls and young women  
529 (AGYW) in Tanzania. *PloS One.* 2021;16(3):e0248153.
- 530 41. Stoebenau K, Heise L, Wamoyi J, Bobrova N. Revisiting the understanding of “transactional  
531 sex” in sub-Saharan Africa: A review and synthesis of the literature. *Soc Sci Med.* 2016  
532 Nov;168:186–97.
- 533 42. Leclerc-Madlala S. Age-disparate and intergenerational sex in southern Africa: the dynamics  
534 of hypervulnerability. *AIDS Lond Engl.* 2008 Dec;22 Suppl 4:S17-25.
- 535 43. UNAIDS Terminology Guidelines - 2015 [Internet]. [cited 2023 Jan 9]. Available from:  
536 [https://www.unaids.org/en/resources/documents/2015/2015\\_terminology\\_guidelines](https://www.unaids.org/en/resources/documents/2015/2015_terminology_guidelines)
- 537 44. Knol MJ, VanderWeele TJ. Recommendations for presenting analyses of effect modification  
538 and interaction. *Int J Epidemiol.* 2012 Apr 1;41(2):514–20.
- 539 45. Howe CJ, Cole SR, Lau B, Napravnik S, Eron JJ. Selection Bias Due to Loss to Follow Up  
540 in Cohort Studies. *Epidemiol Camb Mass.* 2016 Jan;27(1):91–7.
- 541 46. Cole SR, Hernán MA. Constructing inverse probability weights for marginal structural  
542 models. *Am J Epidemiol.* 2008 Sep 15;168(6):656–64.
- 543 47. Stuart EA, Azur M, Frangakis C, Leaf P. Multiple Imputation With Large Data Sets: A Case  
544 Study of the Children’s Mental Health Initiative. *Am J Epidemiol.* 2009 May 1;169(9):1133–  
545 9.
- 546 48. Azur MJ, Stuart EA, Frangakis C, Leaf PJ. Multiple imputation by chained equations: what  
547 is it and how does it work? *Int J Methods Psychiatr Res.* 2011 Feb 24;20(1):40–9.



- 548 49. Gichane MW, Rosenberg NE, Zimmer C, Pettifor AE, Maman S, Maseko B, et al. Individual  
549 and Relationship-Level Correlates of Transactional Sex Among Adolescent Girls and Young  
550 Women in Malawi: A Multilevel Analysis. *AIDS Behav.* 2022;26(3):822–32.
- 551 50. Birdthistle I, Kwaro D, Shahmanesh M, Baisley K, Khagayi S, Chimbindi N, et al.  
552 Evaluating the impact of DREAMS on HIV incidence among adolescent girls and young  
553 women: A population-based cohort study in Kenya and South Africa. *PLoS Med.* 2021  
554 Oct;18(10):e1003837.
- 555 51. Iwelunmor J, Nwaozuru U, Obiezu-Umeh C, Uzoaru F, Ehiri J, Curley J, et al. Is it time to  
556 RE-AIM? A systematic review of economic empowerment as HIV prevention intervention  
557 for adolescent girls and young women in sub-Saharan Africa using the RE-AIM framework.  
558 *Implement Sci Commun.* 2020 Jun 10;1(1):53.
- 559 52. Groves AK, Maman S, Stankard PH, Gebrekristos LT, Amon JJ, Moodley D. Addressing the  
560 unique needs of adolescent mothers in the fight against HIV. *J Int AIDS Soc.* 2018 Jun  
561 29;21(6):e25155.
- 562 53. Kasirye R, Laurenzi C, Nabulya A, Nakijoba B. Safe spaces, vocational training, and  
563 prevention programs protect young Ugandan women: findings from Uganda Youth  
564 Development Link’s DREAMS initiative for rural communities. *Vulnerable Child Youth*  
565 *Stud.* 2023 Apr 3;18(2):195–206.
- 566 54. Kangaude G, Coast E, Fetters T. Adolescent sexual and reproductive health and universal  
567 health coverage: a comparative policy and legal analysis of Ethiopia, Malawi and Zambia.  
568 *Sex Reprod Health Matters.* 28(2):1832291.
- 569 55. Gichane MW, Moracco KE, Pettifor AE, Zimmer C, Maman S, Phanga T, et al.  
570 Socioeconomic Predictors of Transactional Sex in a Cohort of Adolescent Girls and Young  
571 Women in Malawi: A Longitudinal Analysis. *AIDS Behav.* 2020 Dec 1;24(12):3376–84.
- 572 56. Busza J, Mtetwa S, Mapfumo R, Hanisch D, Wong-Gruenwald R, Cowan F. Underage and  
573 underserved: reaching young women who sell sex in Zimbabwe. *AIDS Care.* 2016;28 Suppl  
574 2:14–20.
- 575 57. Napierala S, Chabata ST, Fearon E, Davey C, Hargreaves J, Busza J, et al. Engagement in  
576 HIV Care Among Young Female Sex Workers in Zimbabwe. *J Acquir Immune Defic Syndr*  
577 *1999.* 2018 01;79(3):358–66.
- 578 58. Chabata ST, Makandwa R, Hensen B, Mushati P, Chiyaka T, Musemburi S, et al. Strategies  
579 to Identify and Reach Young Women Who Sell Sex With HIV Prevention and Care Services:  
580 Lessons Learnt From the Implementation of DREAMS Services in Two Cities in Zimbabwe.  
581 *JMIR Public Health Surveill.* 2022 Jul 27;8(7):e32286.
- 582 59. Chabata ST, Hensen B, Chiyaka T, Mushati P, Musemburi S, Dirawo J, et al. The impact of  
583 the DREAMS partnership on HIV incidence among young women who sell sex in two  
584 Zimbabwean cities: results of a non-randomised study. *BMJ Glob Health.* 2021 Apr  
585 1;6(4):e003892.

- 586 60. Bhattacharjee P, Musau A, Manguro G, Ongwen P, Mutegi J, Kioko J, et al. HIV prevention  
587 programme with young women who sell sex in Mombasa, Kenya: learnings for scale-up. *J*  
588 *Int AIDS Soc.* 2022;25(8):e25969.
- 589 61. Hensen B, Chabata ST, Floyd S, Chiyaka T, Mushati P, Busza J, et al. HIV risk among  
590 young women who sell sex by whether they identify as sex workers: analysis of  
591 respondent-driven sampling surveys, Zimbabwe, 2017. *J Int AIDS Soc* [Internet]. 2019 Dec  
592 3 [cited 2020 May 9];22(12). Available from:  
593 <https://www.ncbi.nlm.nih.gov/pmc/articles/PMC6887898/>
- 594 62. Ranganathan M, MacPhail C, Pettifor A, Kahn K, Khoza N, Twine R, et al. Young women's  
595 perceptions of transactional sex and sexual agency: a qualitative study in the context of rural  
596 South Africa. *BMC Public Health.* 2017 Aug 22;17:666.
- 597 63. Milovanovic M, Jewkes R, Matuludi M, Dunkle K, Hlongwane K, Vanleeuw L, et al. Sex  
598 work and young women: a cross sectional study to understand the overlap of age and sex  
599 work as a central tenet to epidemic control in South Africa. *AIDS Care.* 2022 Apr 4;1–9.
- 600 64. Bowring AL, Ketende S, Rao A, Njindam IM, Decker MR, Lyons C, et al. Characterising  
601 unmet HIV prevention and treatment needs among young female sex workers and young  
602 men who have sex with men in Cameroon: a cross-sectional analysis. *Lancet Child Adolesc*  
603 *Health.* 2019 Jul 1;3(7):482–91.
- 604 65. Degtiar I, Rose S. A Review of Generalizability and Transportability. *Annu Rev Stat Its*  
605 *Appl.* 2023;10(1):null.
- 606 66. HIV and adolescents: focus on young key populations - Bekker - 2015 - *Journal of the*  
607 *International AIDS Society - Wiley Online Library* [Internet]. [cited 2022 Jul 15]. Available  
608 from: <https://onlinelibrary.wiley.com/doi/full/10.7448/IAS.18.2.20076>
- 609 67. Cheuk E, Isac S, Musyoki H, Pickles M, Bhattacharjee P, Gichangi P, et al. Informing HIV  
610 Prevention Programs for Adolescent Girls and Young Women: A Modified Approach to  
611 Programmatic Mapping and Key Population Size Estimation. *JMIR Public Health Surveill.*  
612 2019 Apr 1;5(2):e11196.
- 613 68. Rucinski K, Masankha Banda L, Olawore O, Akolo C, Zakaliya A, Chilongozi D, et al. HIV  
614 Testing Approaches to Optimize Prevention and Treatment for Key and Priority Populations  
615 in Malawi. *Open Forum Infect Dis.* 2022 Apr 1;9(4):ofac038.
- 616 69. Olawore O, Astatke H, Lillie T, Persaud N, Lyons C, Kamali D, et al. Peer Recruitment  
617 Strategies for Female Sex Workers Not Engaged in HIV Prevention and Treatment Services  
618 in Côte d'Ivoire: Program Data Analysis. *JMIR Public Health Surveill.* 2020;6(4):e18000.
- 619 70. Ortblad KF, Mawandia S, Bakae O, Tau L, Grande M, Mogomotsi GP, et al. Using routine  
620 programmatic data to measure HIV incidence among pregnant women in Botswana. *Popul*  
621 *Health Metr.* 2022 Mar 4;20:10.



622 71. Rao A, Mhlophe H, Comins C, Young K, Mcingana M, Lesko C, et al. Persistence on oral  
623 pre-exposure prophylaxis (PrEP) among female sex workers in eThekweni, South Africa,  
624 2016-2020. PloS One. 2022;17(3):e0265434.

625 72. Low A, Gummerson E, Schwitters A, Bonifacio R, Teferi M, Mutenda N, et al. Food  
626 insecurity and the risk of HIV acquisition: findings from population-based surveys in six  
627 sub-Saharan African countries (2016-2017). BMJ Open. 2022 Jul 12;12(7):e058704.

628

## 629 **Supporting Information**

630 **S1 File. SAUTI Adolescent Girls and Young Women Vulnerability Index**

631

632 **S1 Table. Characteristics of 65,185 AGYW accessing combination HIV prevention services**  
633 **in Tanzania through the Sauti Project, 2015-2019**

634

635 **S2 Table. Unadjusted and adjusted associations of A) transactional sex with HIV**  
636 **prevalence; B) age-disparate sex with HIV prevalence; and C) intergenerational sex with**  
637 **HIV prevalence among 4,272 sexually active adolescent girls ages 15-19 accessing**  
638 **combination HIV services in Tanzania through the Sauti Project, 2015-2019**

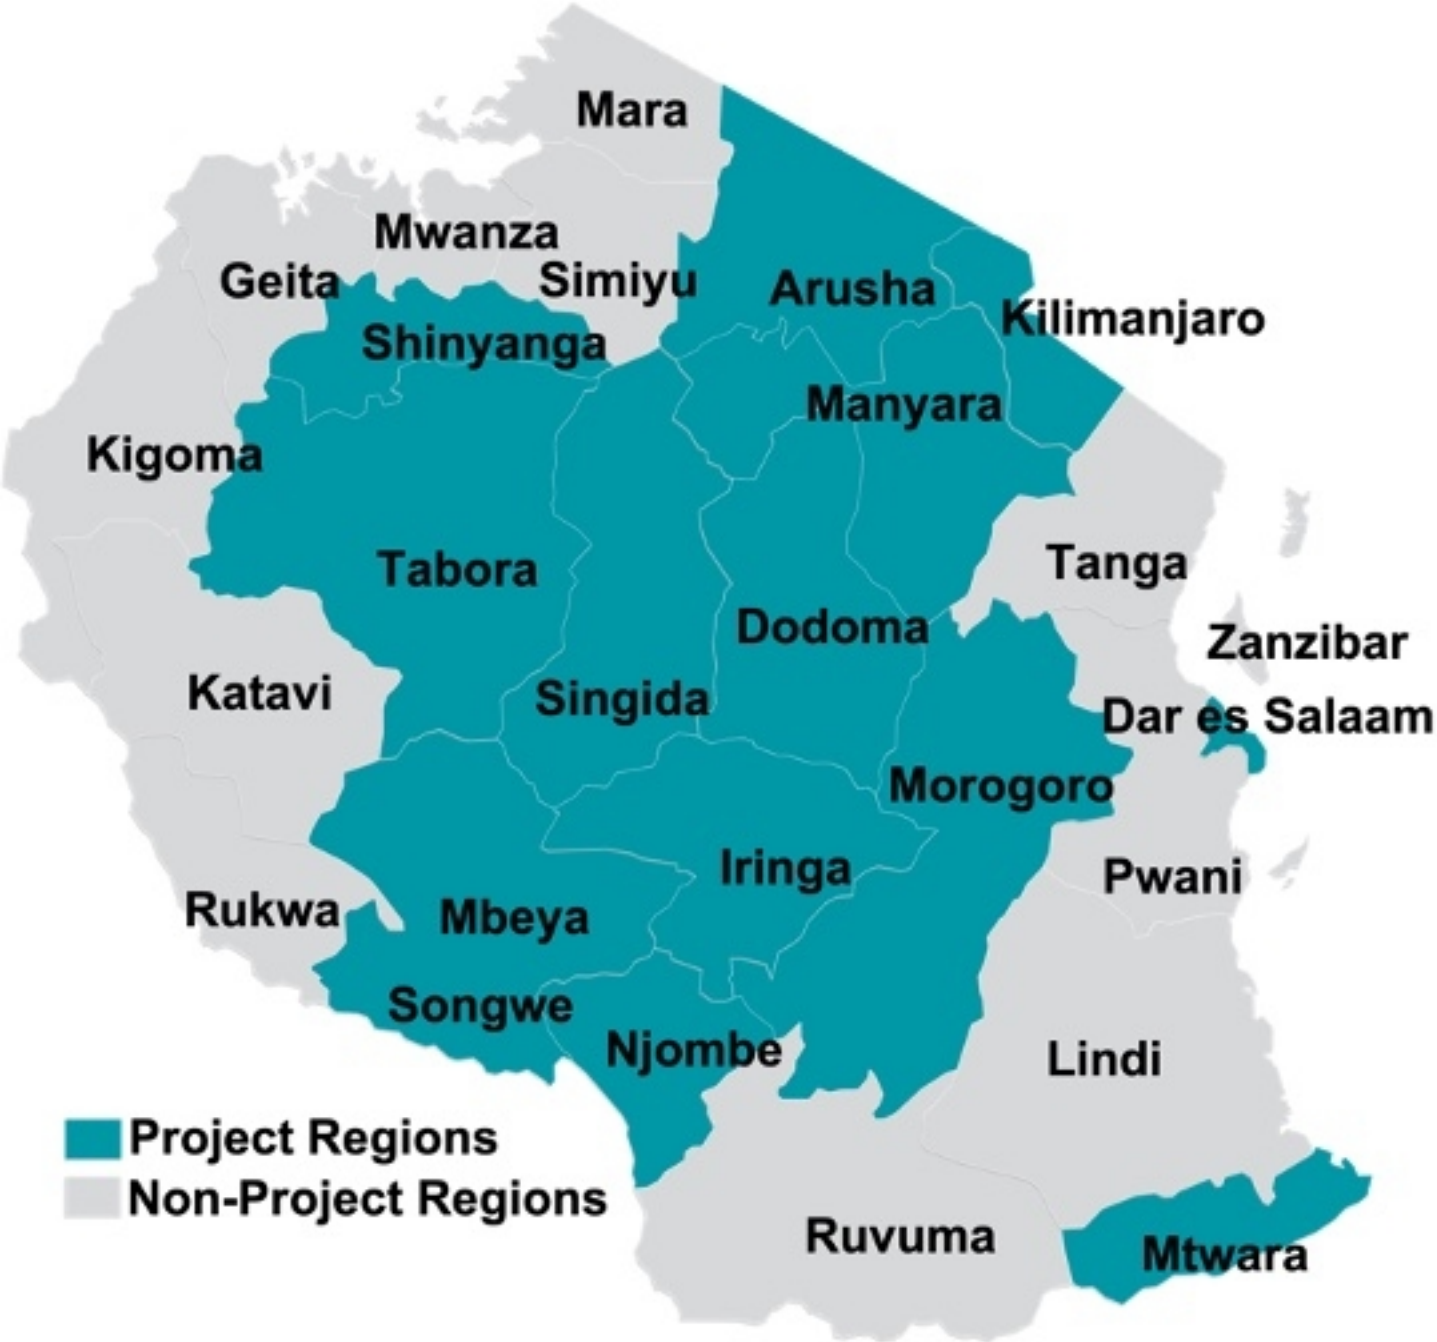

Figure 1

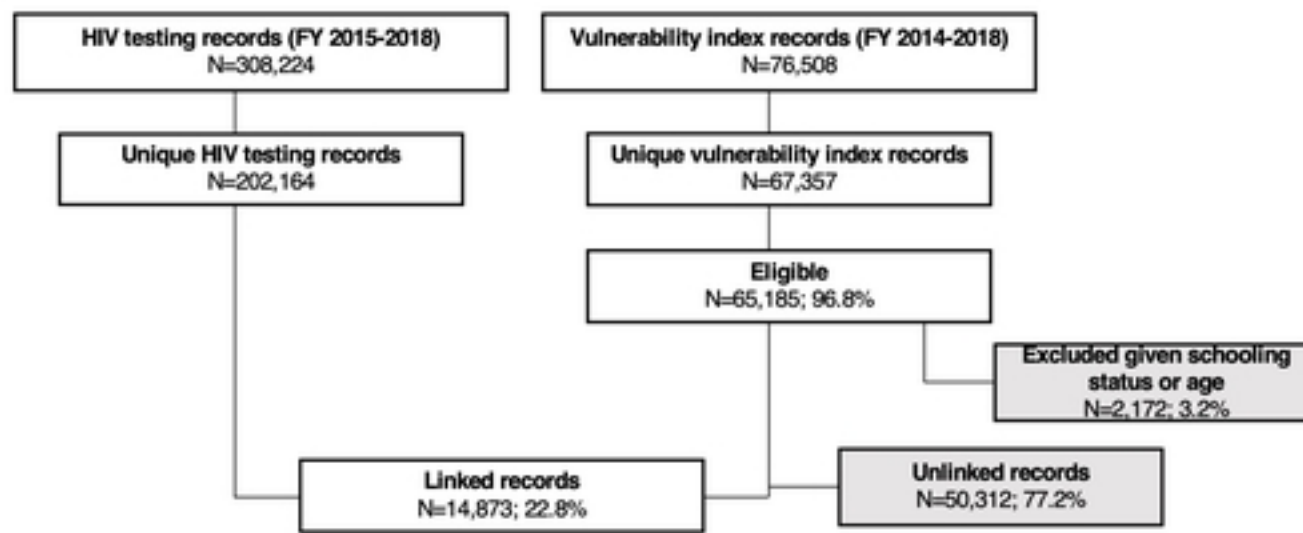

medRxiv preprint doi: <https://doi.org/10.1101/2023.10.09.23296787>; this version posted October 10, 2023. The copyright holder for this preprint (which was not certified by peer review) is the author/funder, who has granted medRxiv a license to display the preprint in perpetuity. It is made available under a [CC-BY 4.0 International license](https://creativecommons.org/licenses/by/4.0/).
